# Supplementary material
Source: PubMed Central journal article supplement (PMC514456)

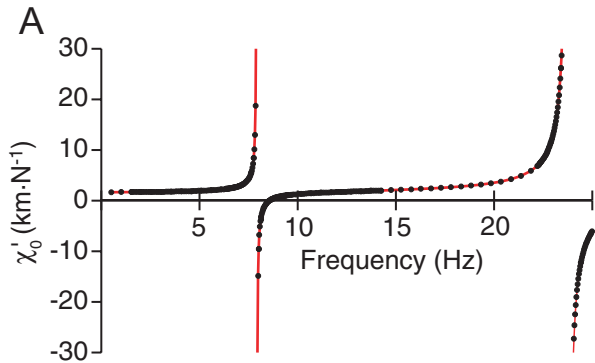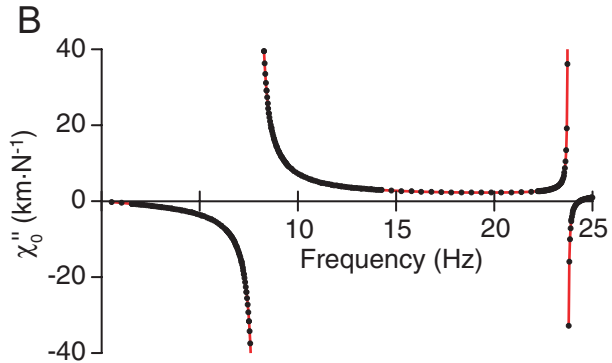

Supplement: pnas_101_33_12195__1.pdf [file pnas_101_33_12195__1.pdf]

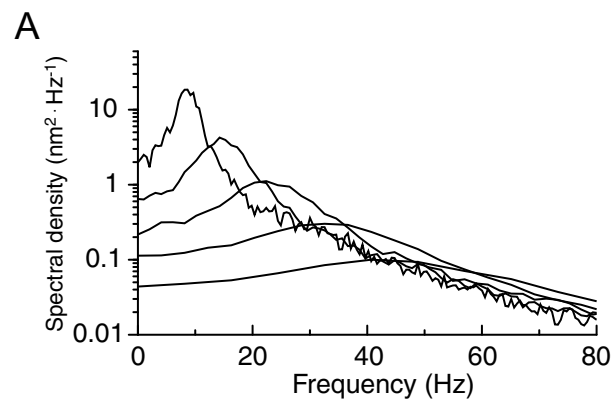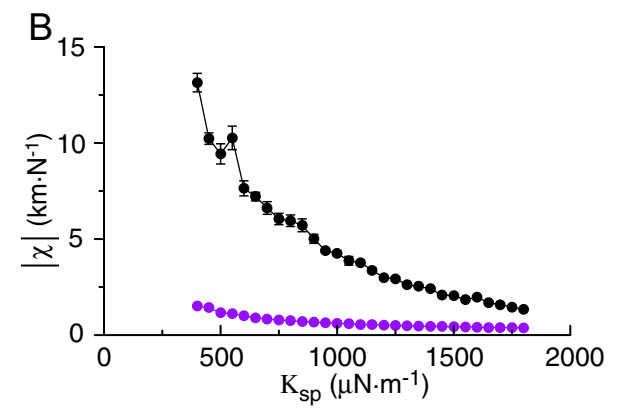

Supplement: pnas_101_33_12195__2.pdf [file pnas_101_33_12195__2.pdf]
